# Supplementary material for: 2D Ferromagnetic M3GeTe2 (M = Ni/Fe) for Boosting Intermediates Adsorption toward Faster Water Oxidation
Source: PubMed Central journal article supplement (PMC11151052; doi:10.1002/advs.202310115), 2024-03-16
Supplement: ADVS-11-2310115-s001.pdf [file ADVS-11-2310115-s001.pdf]

# ADVANCED SCIENCE

Open Access

## Supporting Information

for *Adv. Sci.*, DOI 10.1002/adv.202310115

2D Ferromagnetic  $M_3GeTe_2$  ( $M = Ni/Fe$ ) for Boosting Intermediates Adsorption toward Faster Water Oxidation

*Guyue Bo, Peng Li\**, Yameng Fan, Xiaobo Zheng, Mengting Zhao, Qiang Zhu, Yang Fu, Yitong Li, Wei Kong Pang\*, Wei Hong Lai, Bernt Johannessen, Lars Thomsen, Bruce Cowie, Tianyi Ma, Cheng Wang, Guan Heng Yeoh, Yi Du, Shi Xue Dou and Xun Xu\*

## Supporting Information

### 2D Ferromagnetic $M_3GeTe_2$ ( $M = Ni/Fe$ ) for Boosting Hydroxyl Adsorption toward Highly Efficient Water Oxidation Reaction

*Guyue Bo,<sup>a</sup> Peng Li,<sup>b\*</sup> Yameng Fan,<sup>a</sup> Xiaobo Zheng,<sup>a</sup> Mengting Zhao,<sup>c</sup> Qiang Zhu,<sup>d</sup> Yitong Li,<sup>b</sup> Wei Kong Pang,<sup>a\*</sup> Wei Hong Lai,<sup>a</sup> Bernt Johannessen,<sup>a,e</sup> Lars Thomsen,<sup>e</sup> Bruce Cowie,<sup>e</sup> Cheng Wang,<sup>f</sup> Guan Heng Yeoh,<sup>f</sup> Yi Du,<sup>g</sup> Shi Xue Dou,<sup>a,h</sup> Xun Xu<sup>a\*</sup>*

<sup>a</sup> Institute for Superconducting & Electronic Materials, Australian Institute for Innovative Materials, University of Wollongong, Wollongong, NSW 2522, Australia

<sup>b</sup> School of Science, RMIT University, Melbourne, VIC 3000, Australia

<sup>c</sup> School of Physics and Astronomy, Monash University, Clayton, VIC 3800, Australia

<sup>d</sup> Electron Microscopy Center, University of Wollongong, Wollongong, NSW 2500, Australia

<sup>e</sup> Australian Synchrotron, Australian Nuclear Science and Technology Organization Clayton, Victoria 3168, Australia

<sup>f</sup> School of Mechanical and Manufacturing Engineering, University of New South Wales, 2052, Australia

<sup>g</sup> School of Physics and BUAA-UOW Joint Research Centre, Beihang University, Beijing 100191, P.R. China

<sup>h</sup> Institute of Energy Materials Science (IEMS), University of Shanghai for Science and Technology, 516 Jungong Road, Shanghai, 200093, China

\*Correspondence to: Peng Li (peng.li2@rmit.edu.au) (P.L.), Wei Kong Pang (wkpang@uow.edu.au) (W.K.P.), and Xun Xu (xun@uow.edu.au) (X.X.)

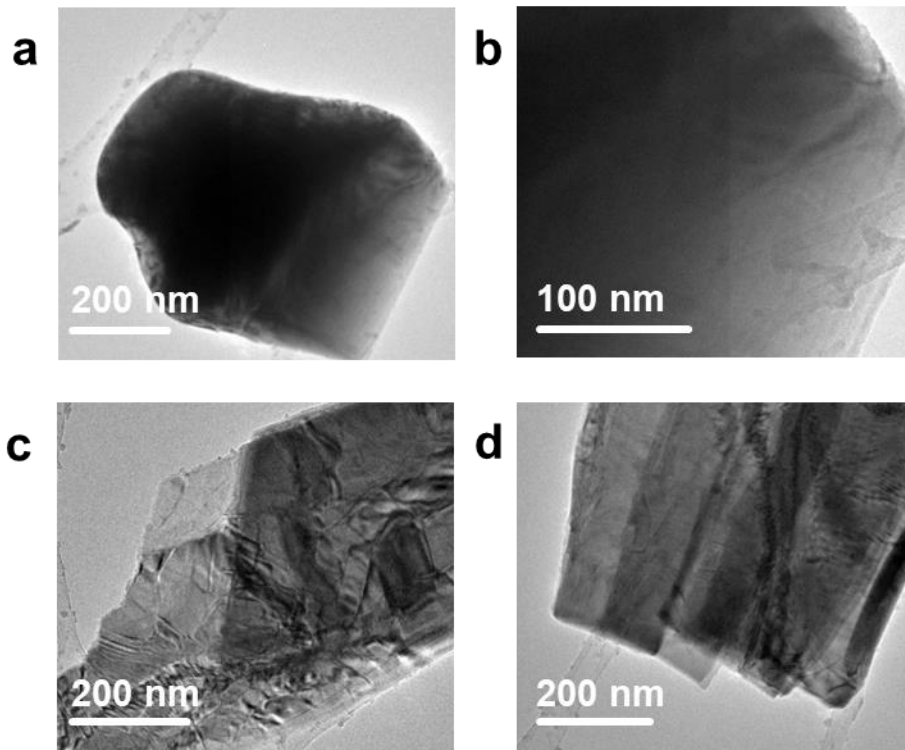

**Figure S1.** TEM images of Bulk-NGT.

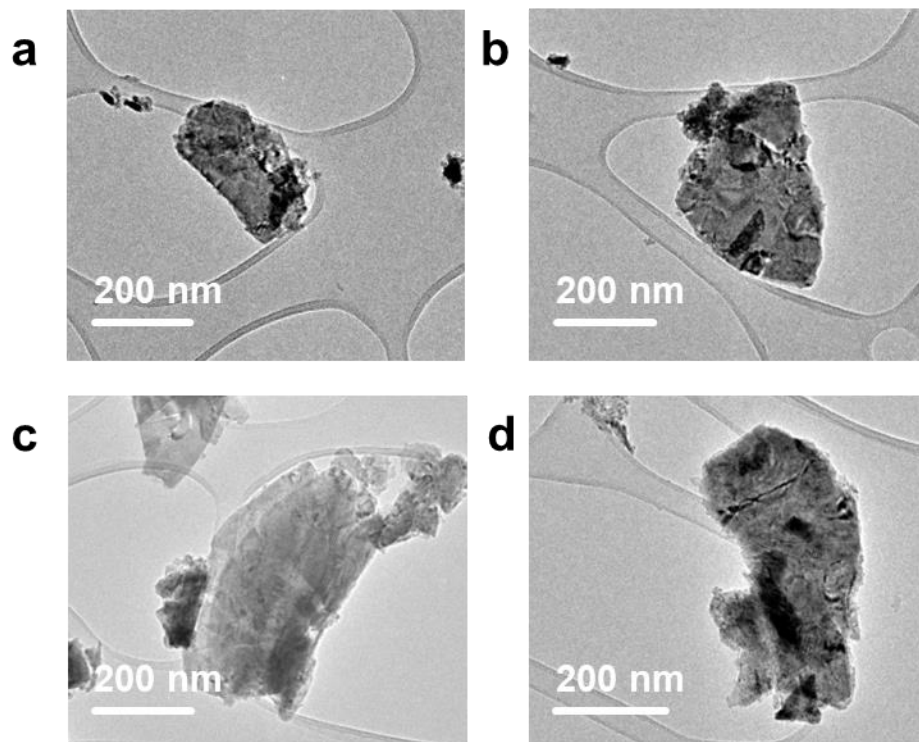

**Figure S2.** TEM images of 2D-NGT<sub>v</sub>.

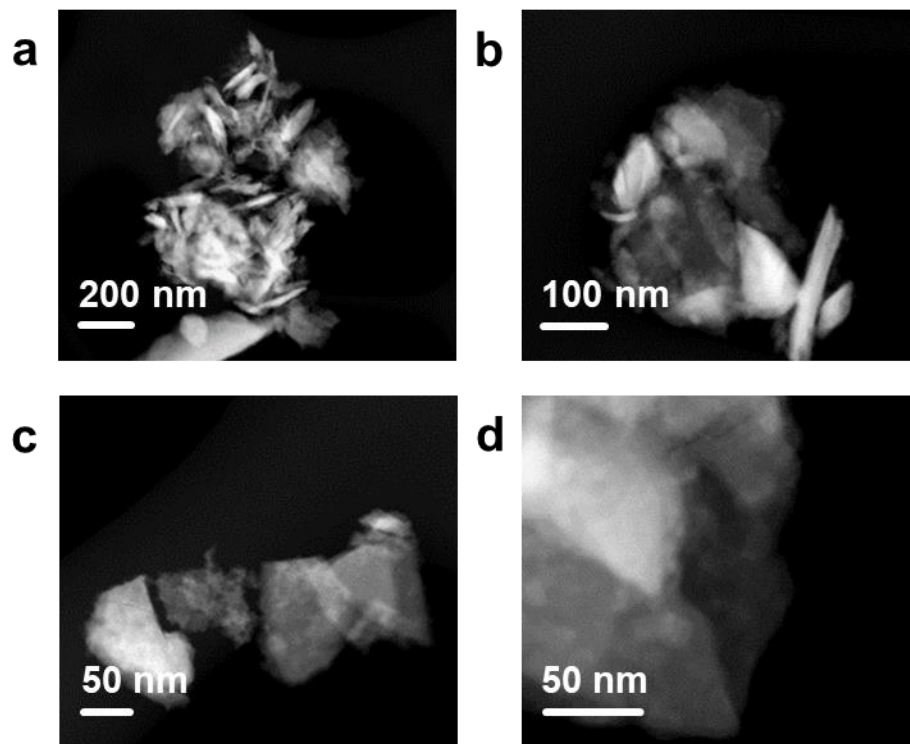

**Figure S3.** HAADF-STEM images of 2D-NGT<sub>v</sub>.

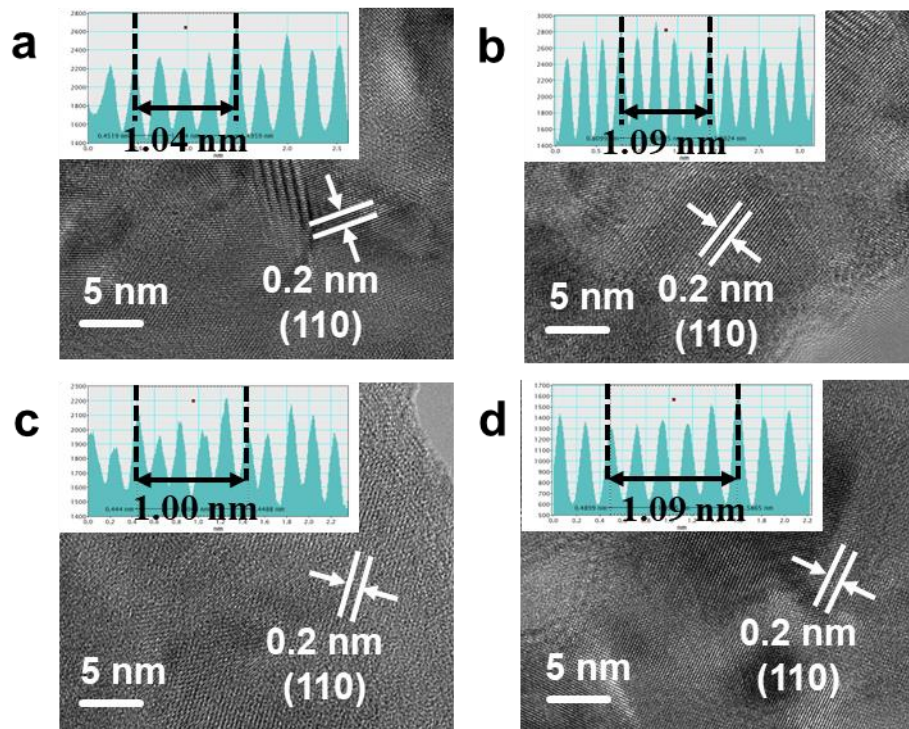

**Figure S4.** HRTEM Images of 2D-NGT<sub>v</sub>.

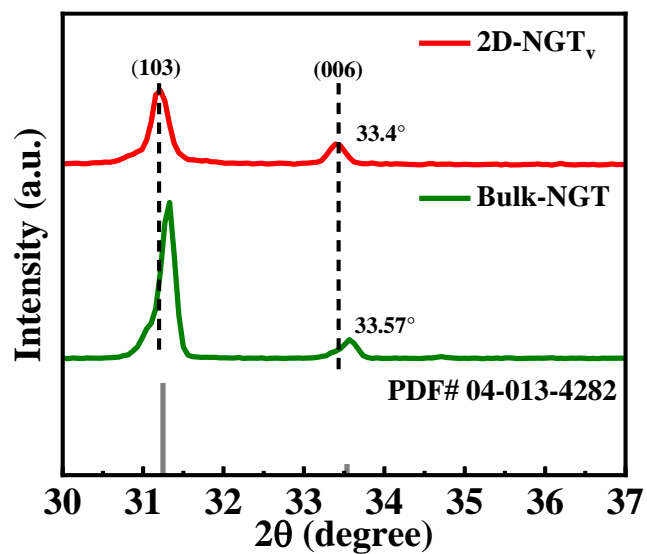

**Figure S5.** X-ray diffraction (XRD) patterns of Bulk-NGT and 2D-NGT<sub>v</sub> (30° - 37°). The details about the diffraction peak of (006) for Bulk-NGT and 2D-NGT<sub>v</sub> indicate the lattice expansion.

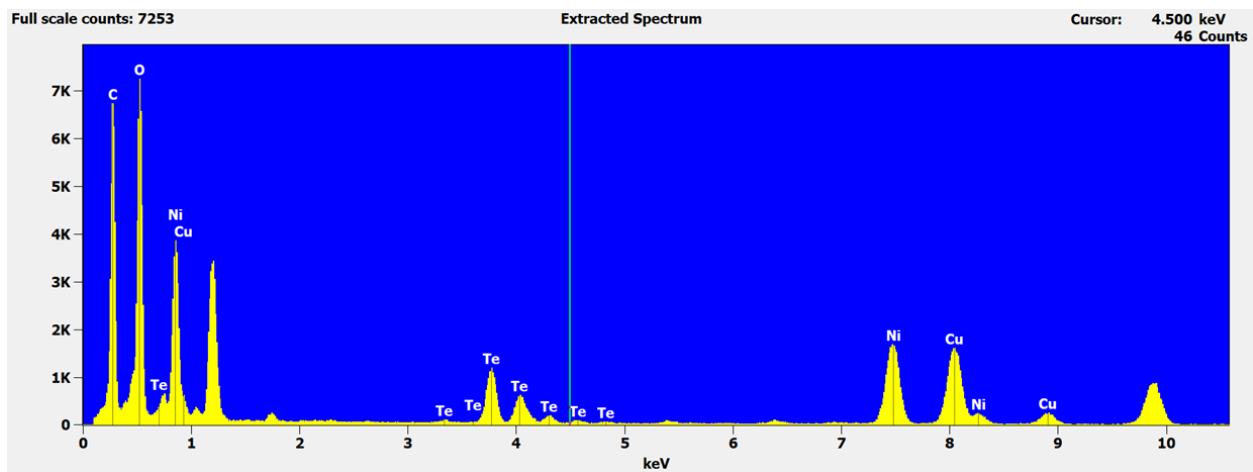

**Figure S6.** EDS spectrum of 2D-NGT<sub>v</sub>, confirming the existence of Ni, Ge, and Te in the sample.



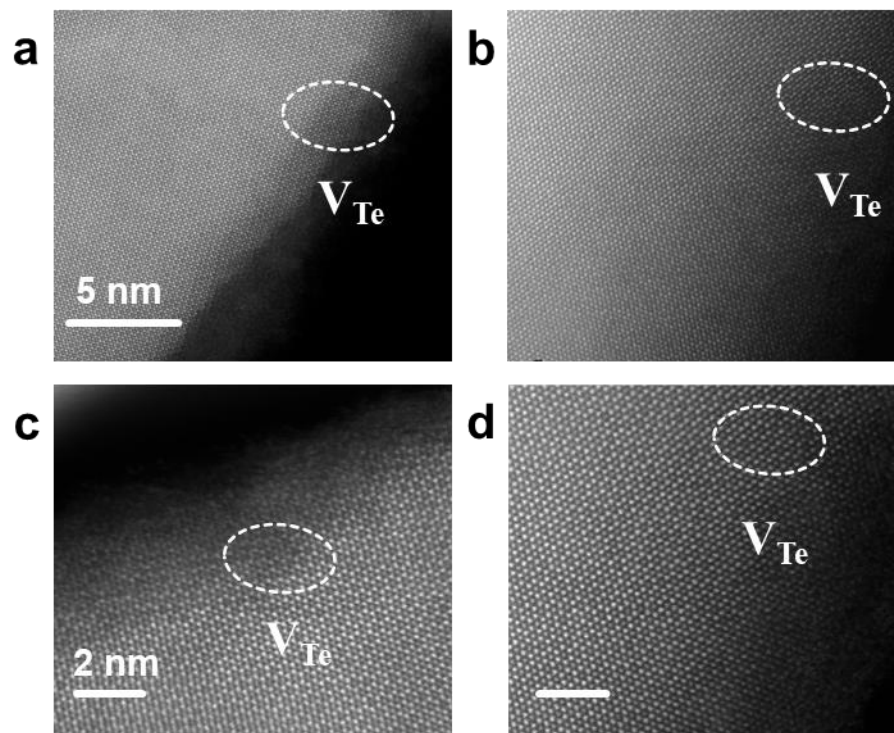

**Figure S7.** STEM of 2D-NGT<sub>v</sub>.

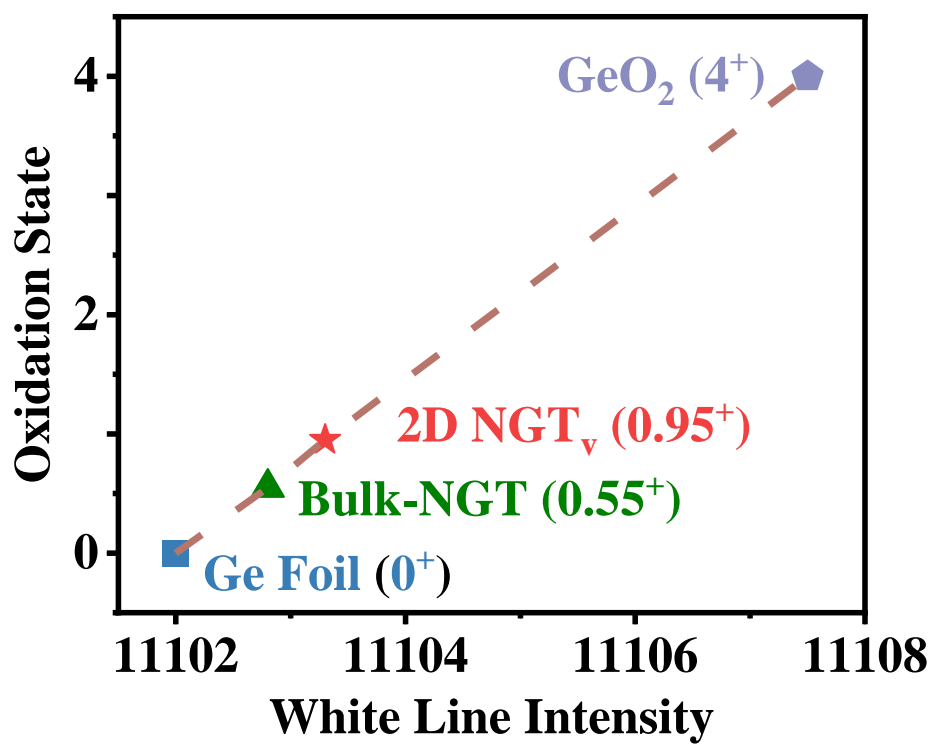

**Figure S8.** Average oxidation states via Ge XANES for Bulk-NGT, 2D-NGT<sub>v</sub>, Ge Foil, and GeO<sub>2</sub>.

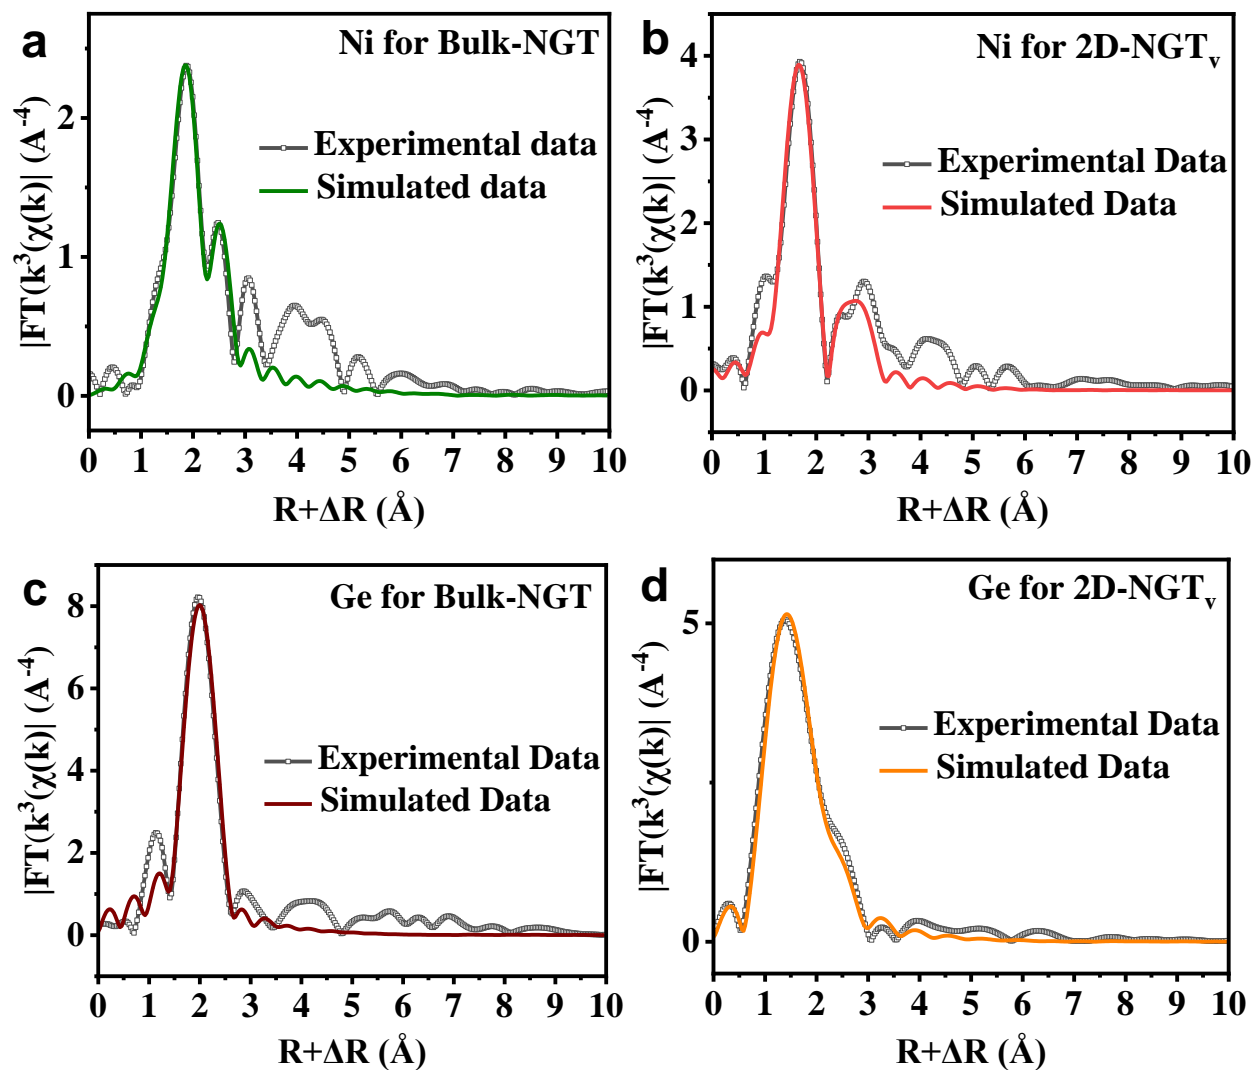

**Figure S9.** Ni K-edge EXAFS spectra and corresponding fitted spectra of (a) Bulk-NGT (b) 2D-NGT<sub>v</sub>, Ge K-edge EXAFS spectra, and the corresponding fitted spectra (c) Bulk-NGT (d) 2D-NGT<sub>v</sub>.

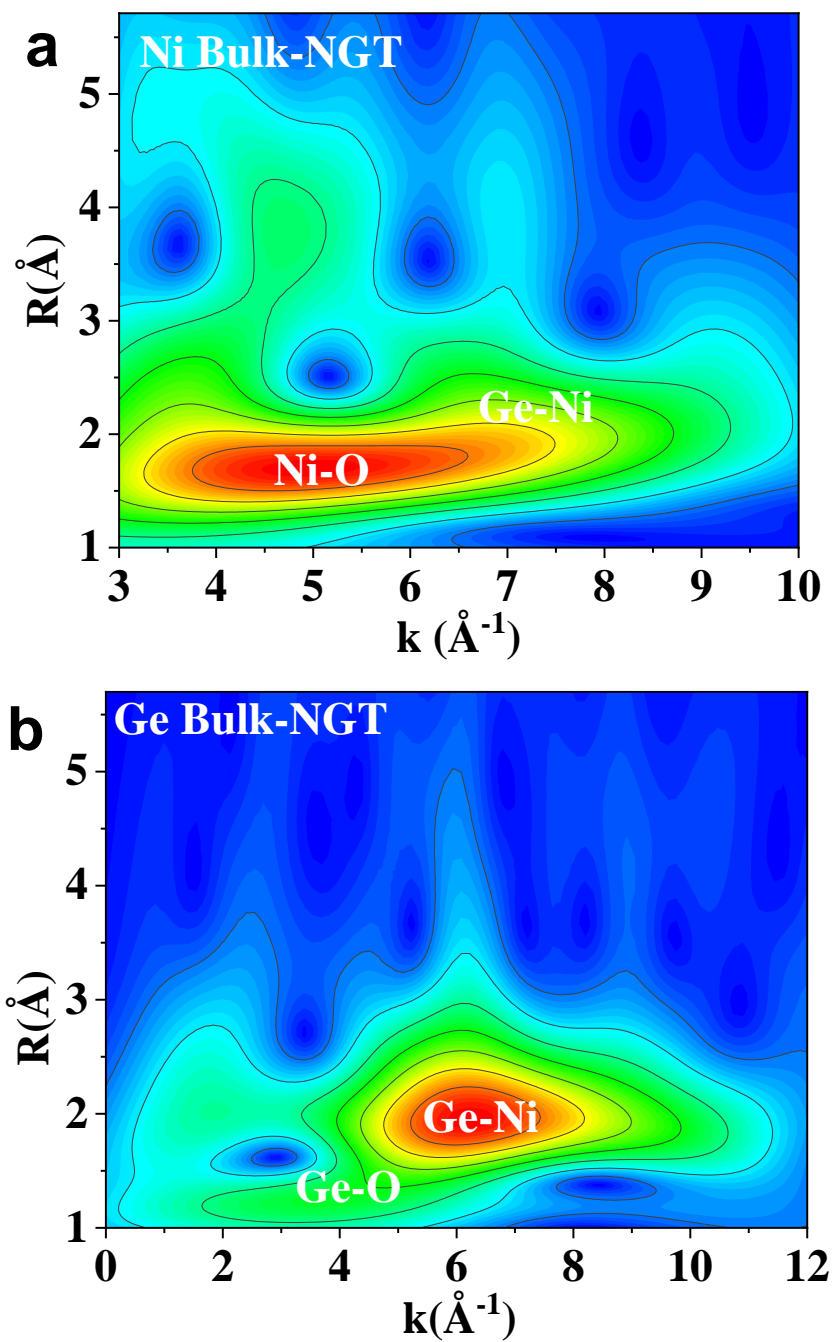

**Figure S10.** (a) WT for Bulk-NGT Ni K-edge. (b) WT for Bulk-NGT Ge K-edge.

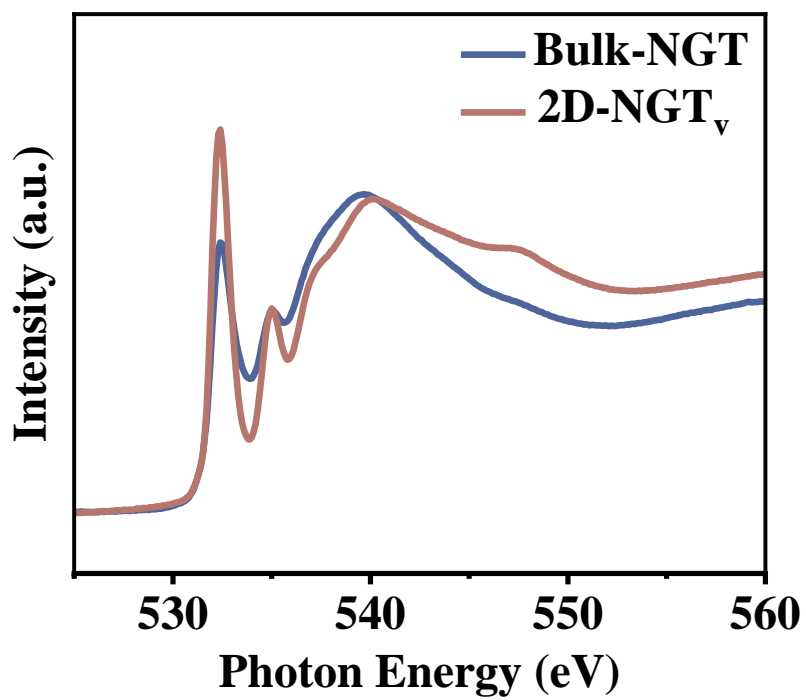

**Figure S11.** O K-edge profiles of Bulk-NGT and 2D-NGT<sub>v</sub>.

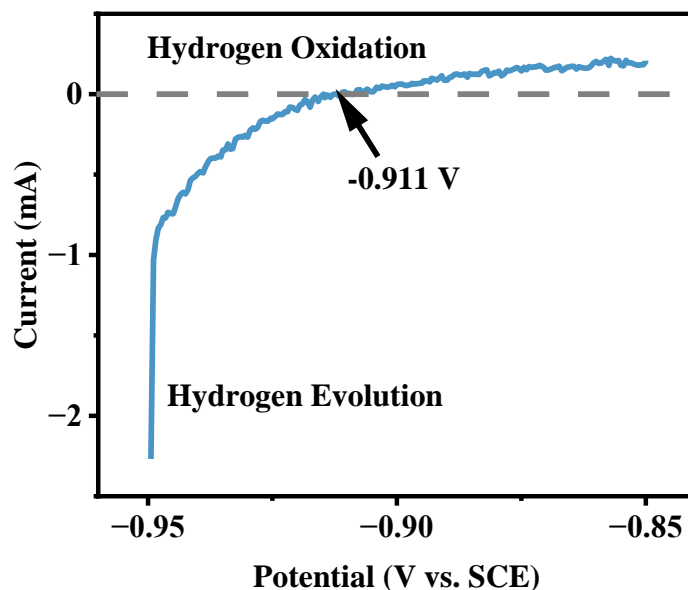

**Figure S12.** The LSV curve for reference electrode calibration. the calibration of the reference electrode was conducted in the 0.1 M KOH solution. Specifically, Ir blank coated onto Pt mesh was used as the working electrode and Pt wire was used as the counter electrode. The Hg/HgO electrode was employed as the reference electrode. During the calibration, pure H<sub>2</sub> gases (1 atm) were bubbled into the 0.1 M KOH solution until fully saturation conditions. After that, the polarization curve was captured and presented below. The standard hydrogen electrode is recognized as 0 V.

$$0 \text{ V. SHE} = E_{(\text{Hg}/\text{HgO})} + E^{\circ}_{(\text{Hg}/\text{HgO})} + (0.059 \times \text{pH})$$

$$E^{\circ}_{(\text{Hg}/\text{HgO})} = - (E_{(\text{Hg}/\text{HgO})} + (0.059 \times \text{pH})) = 0.11 \text{ V vs. SHE}$$

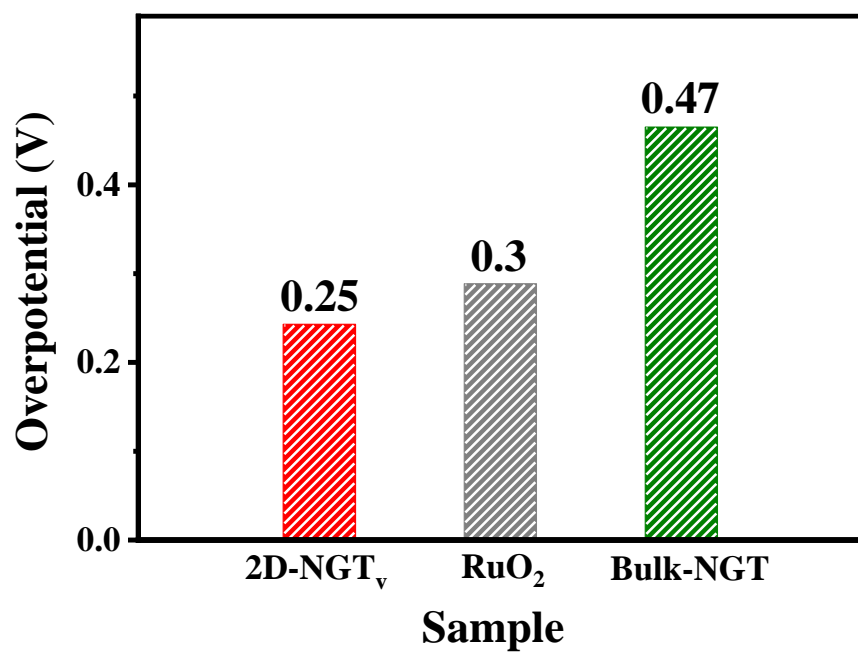

**Figure S13.** The Overpotential for 2D-NGT<sub>v</sub>, Bulk-NGT, and RuO<sub>2</sub> at current density of 10 mA cm<sup>-2</sup>.

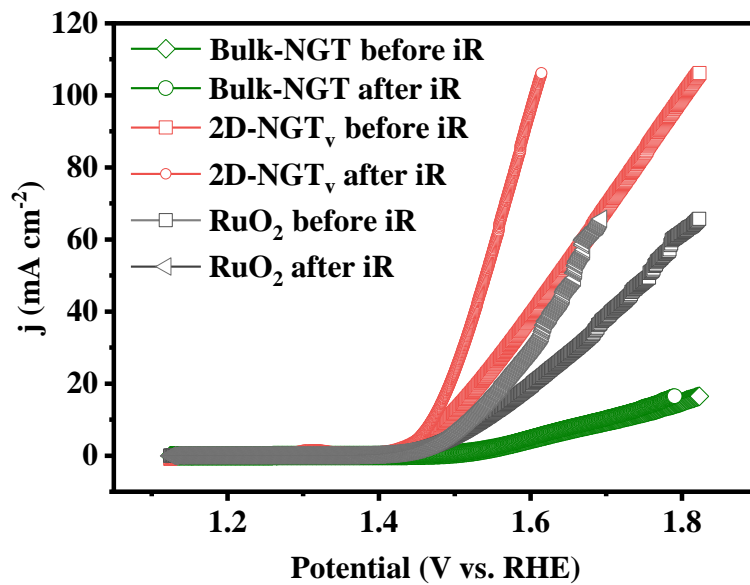

**Figure S14.** LSV curve of NGT catalysts and RuO<sub>2</sub> before and after iR feedback, the impedance of 2D-NGT<sub>v</sub>, Bulk-NGT, and RuO<sub>2</sub> is  $\sim 9.8 \Omega$ ,  $\sim 10.1 \Omega$ , and  $\sim 10.5 \Omega$ , separately.



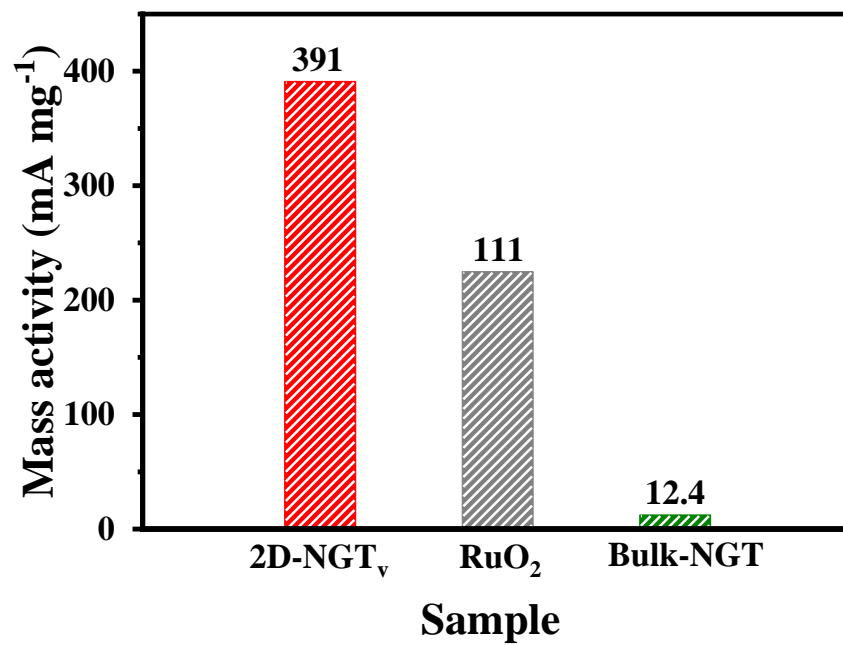

**Figure S15.** Mass specific activities of 2D-NGT<sub>v</sub>, Bulk-NGT, and RuO<sub>2</sub> at overpotential of 250 mV.

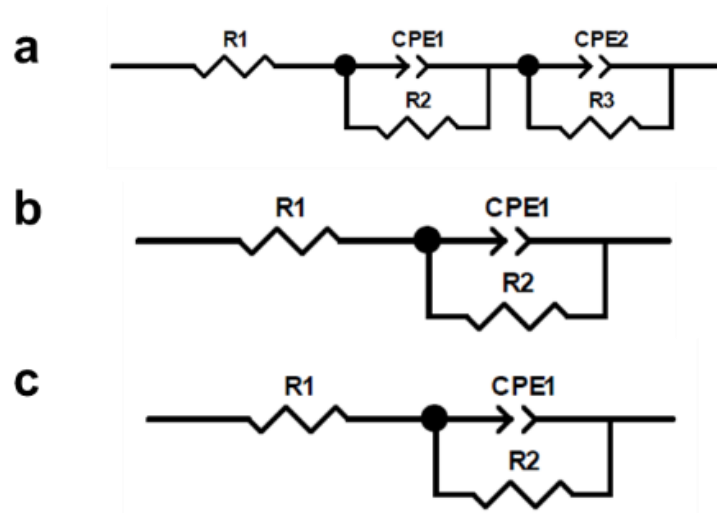

**Figure S16.** The equivalent circuit of 2D-NGT<sub>v</sub>, Bulk-NGT and RuO<sub>2</sub>. The fitted values are shown in Table S3.

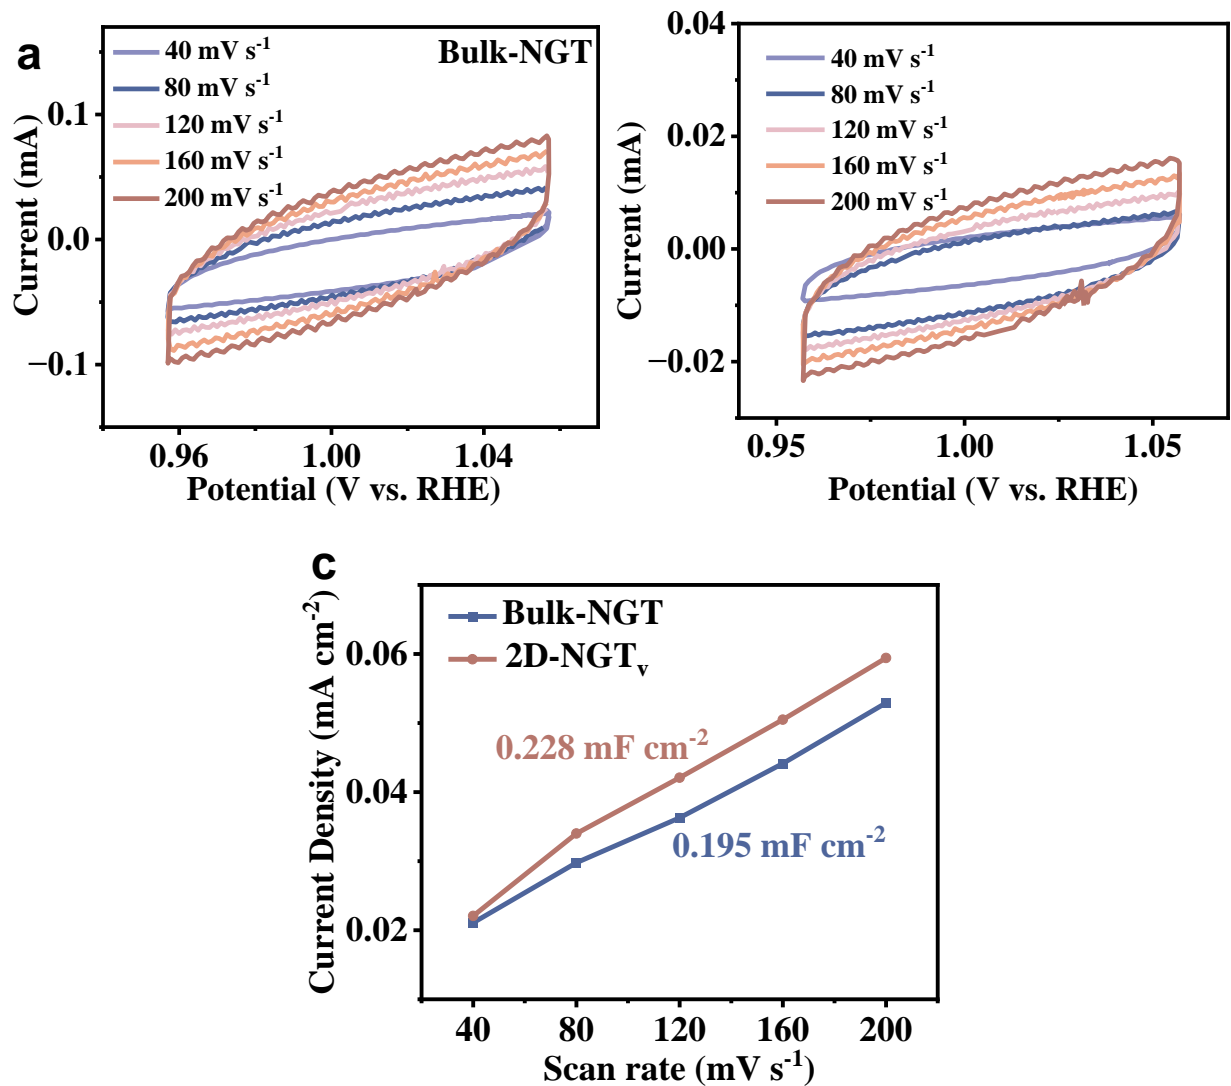

**Figure S17.** ECSA in 1M KOH. CV scans of (a) Bulk-NGT, (b) 2D-NGT<sub>v</sub> in 1M KOH at various scan rates between 40 mV s<sup>-1</sup> and 200 mV s<sup>-1</sup>. (c) Double-layer capacitance (C<sub>dl</sub>) plots.

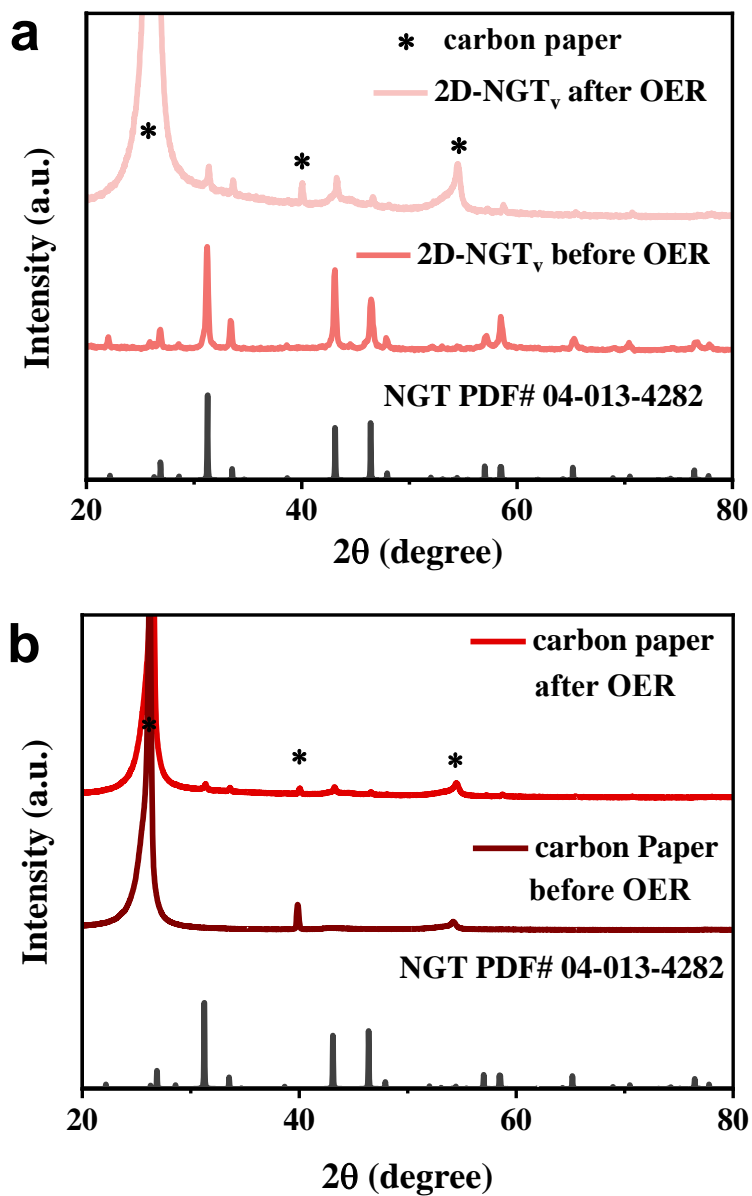

**Figure S18.** (a) XRD pattern 2D-NGT<sub>v</sub> after and before OER, suggesting the 2D-NGT<sub>v</sub> existing after OER. (b) The XRD pattern of 2D-NGT<sub>v</sub> after OER and Carbon paper.

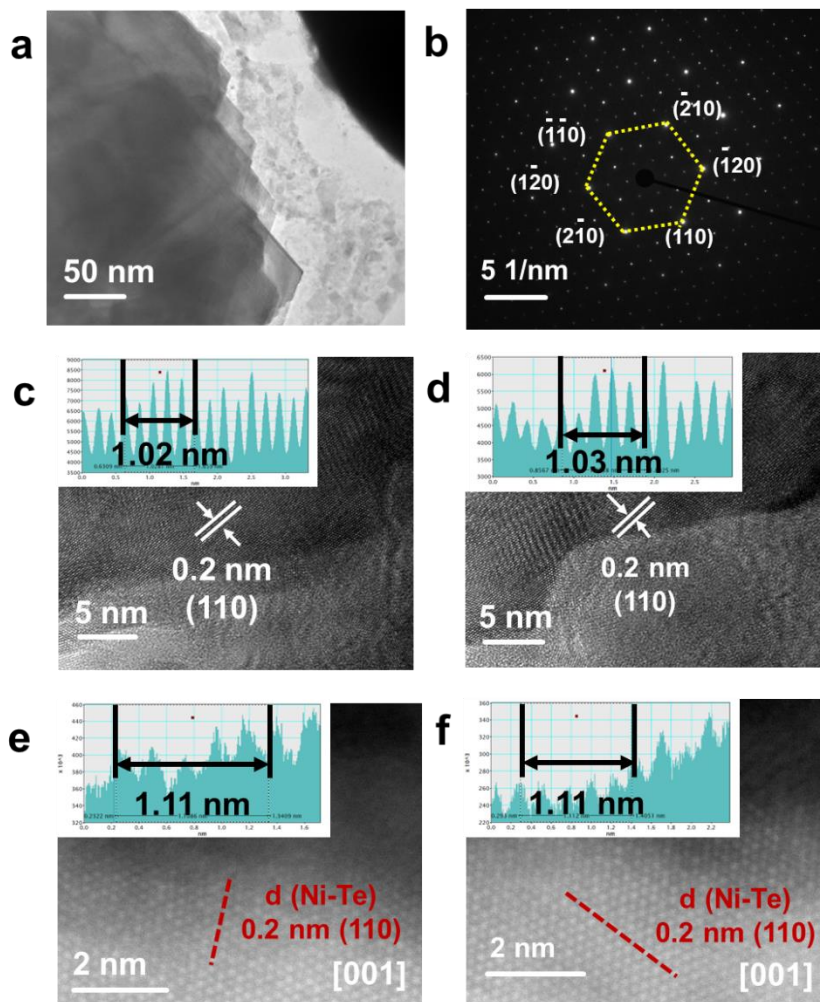

**Figure S19.** (a) TEM image of 2D-NGT<sub>v</sub> after OER. (b) SAED pattern of 2D-NGT<sub>v</sub> after OER. (c-d) HRTEM images of 2D-NGT<sub>v</sub> after OER. The intensity profile of the white region's line scan is presented in the inset. (e-f) HAADF-STEM images of 2D-NGT<sub>v</sub> after OER along the zone axis of [001]. The line scan intensity profile of the white area has been shown inset. It suggests the presence of Te vacancies after OER.

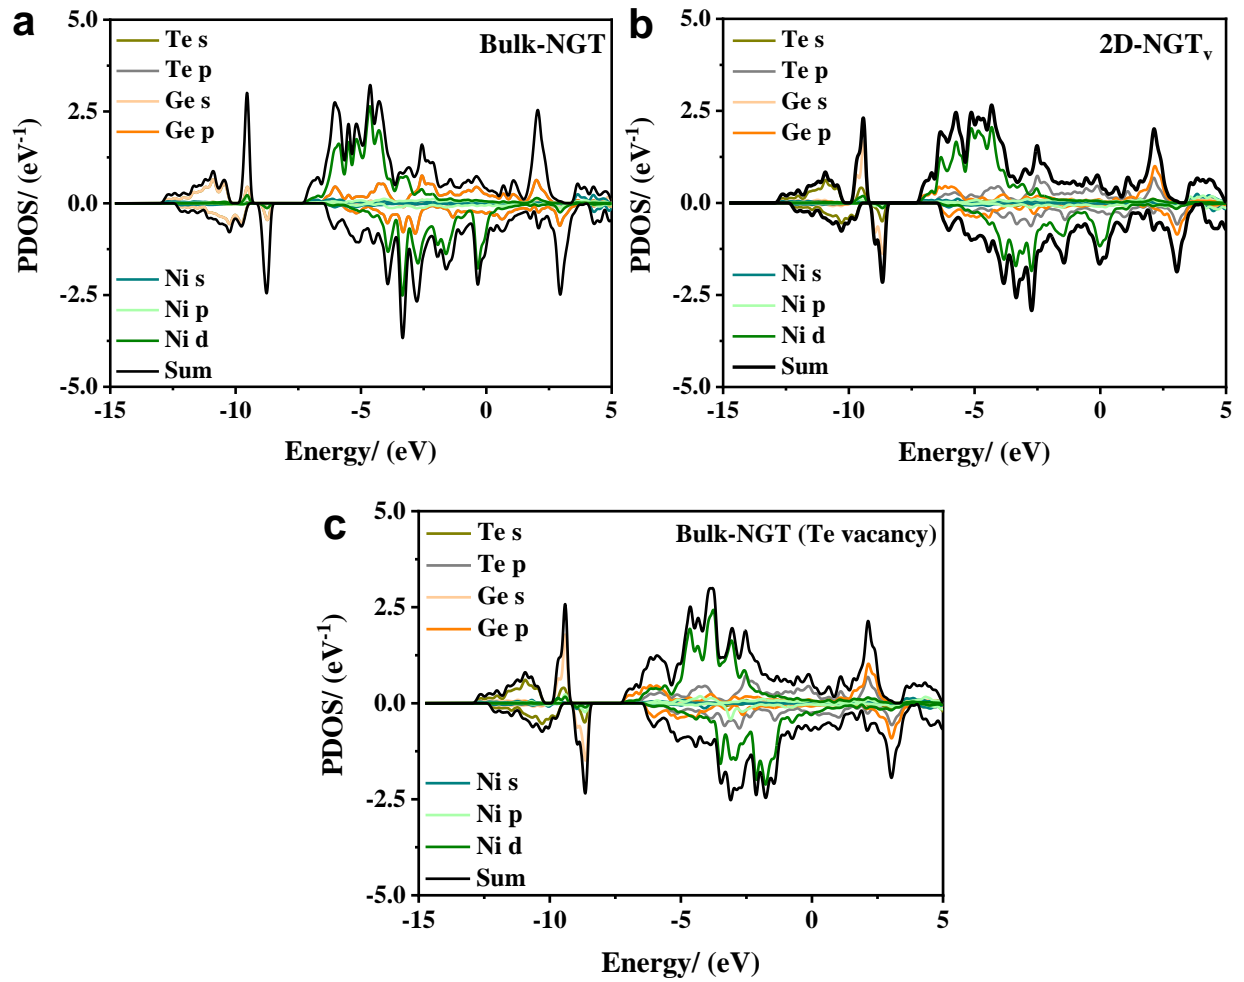

**Figure S20.** The calculated PDOS for (a) Bulk-NGT, (b) 2D-NGT<sub>v</sub>, and (c) Bulk-NGT (Te vacancy).

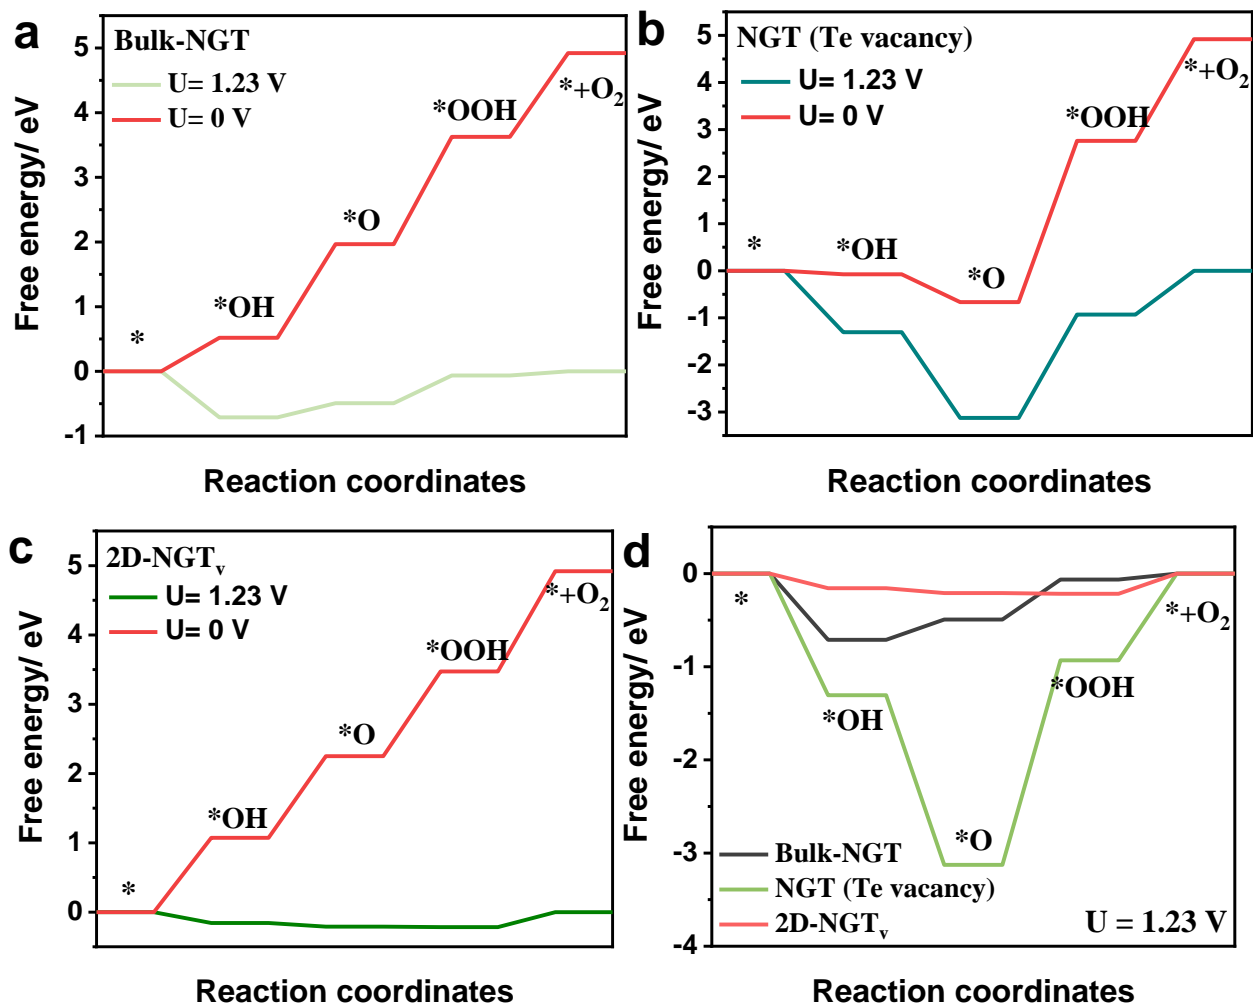

**Figure S21.** Free energy diagrams of OER for (a) Bulk-NGT, (b) NGT (Te vacancy), (c) 2D-NGT<sub>v</sub>, (d) Free energy diagrams at the conditions of U = 0V for Bulk-NGT, NGT (Te vacancy) and 2D-NGT<sub>v</sub>.

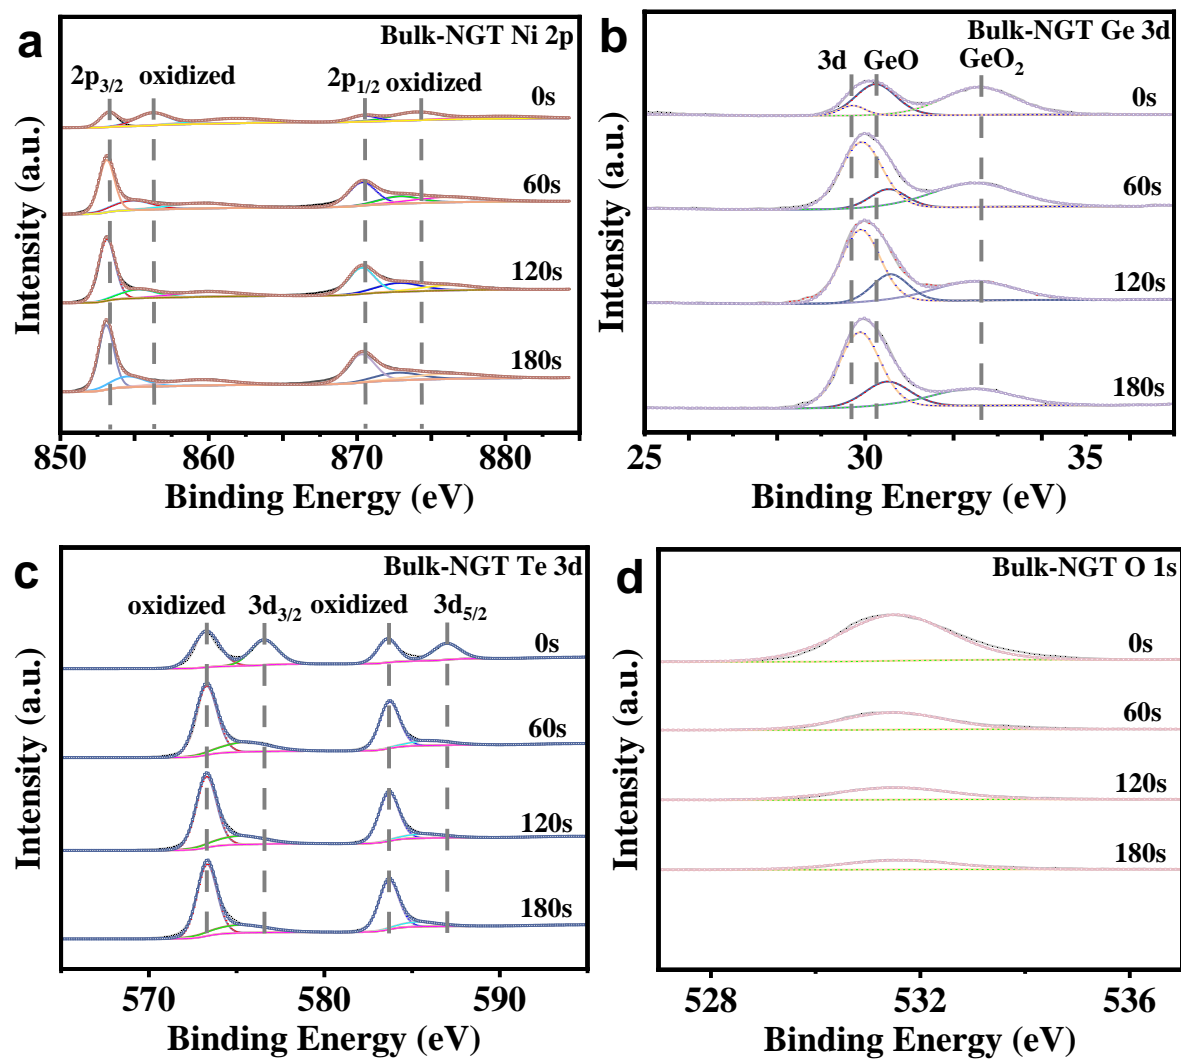

Figure S22. XPS spectra of Bulk-NGT (a) Ni 2p, (b) Ge 3d, (c) Te 3d, (d) O 1s.



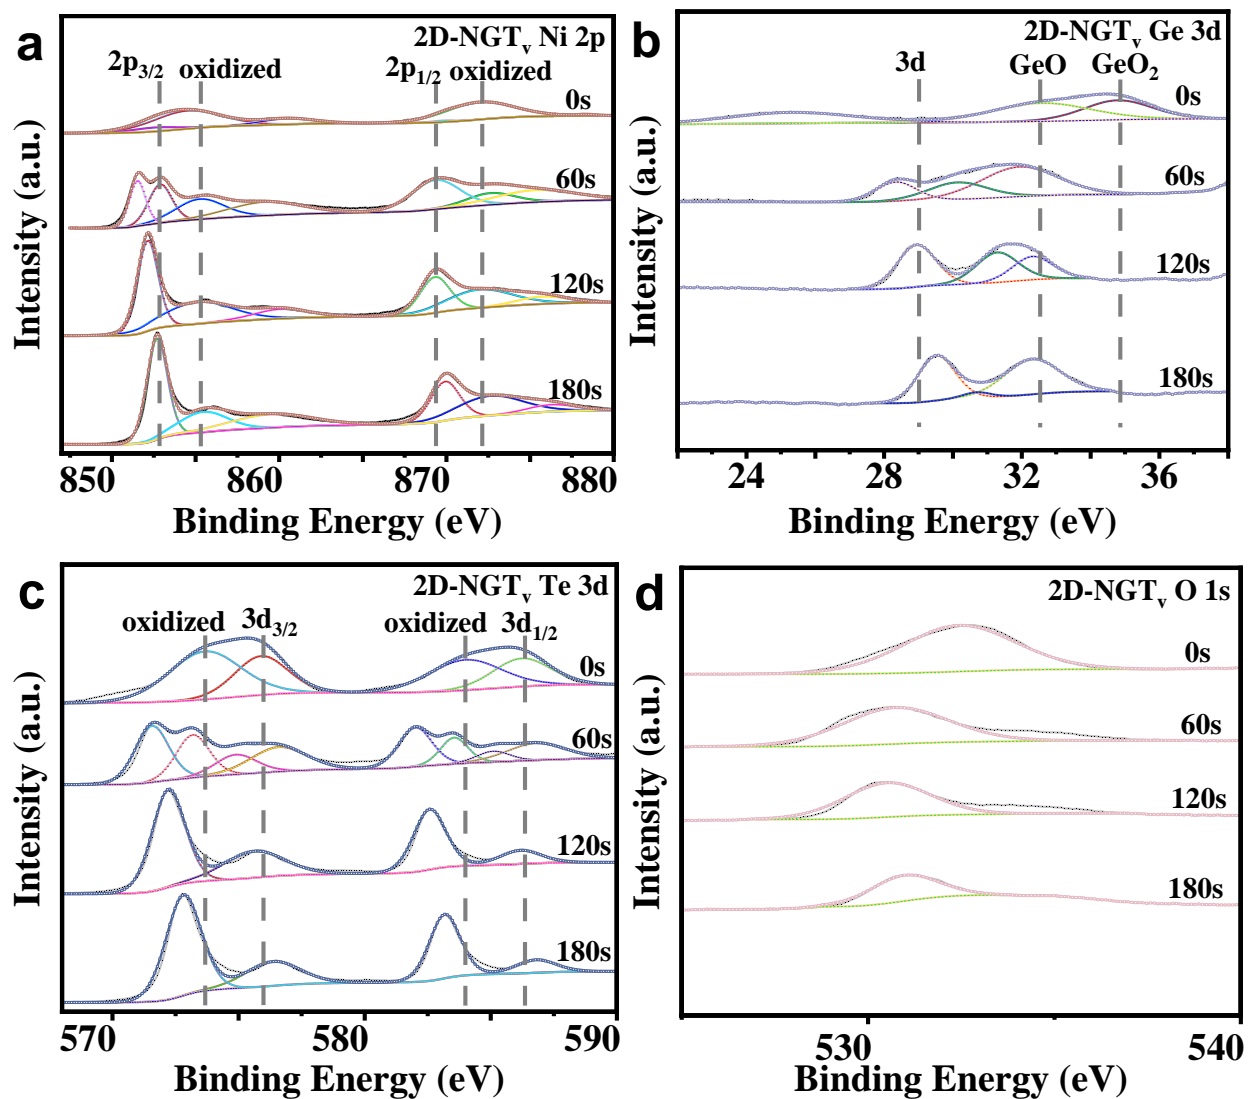

Figure S23. XPS spectra of 2D-NGT<sub>v</sub> (a) Ni 2p, (b) Ge 3d, (c) Te 3d, (d) O 1s.

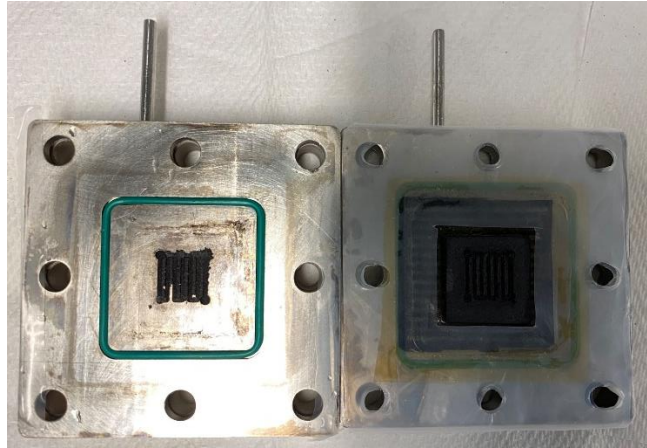

**Figure S24.** The optical images of the assembled anion-exchange membrane water electrolyzer components. This includes two endplates, gaskets, O-rings, and catalysts-coated membranes.

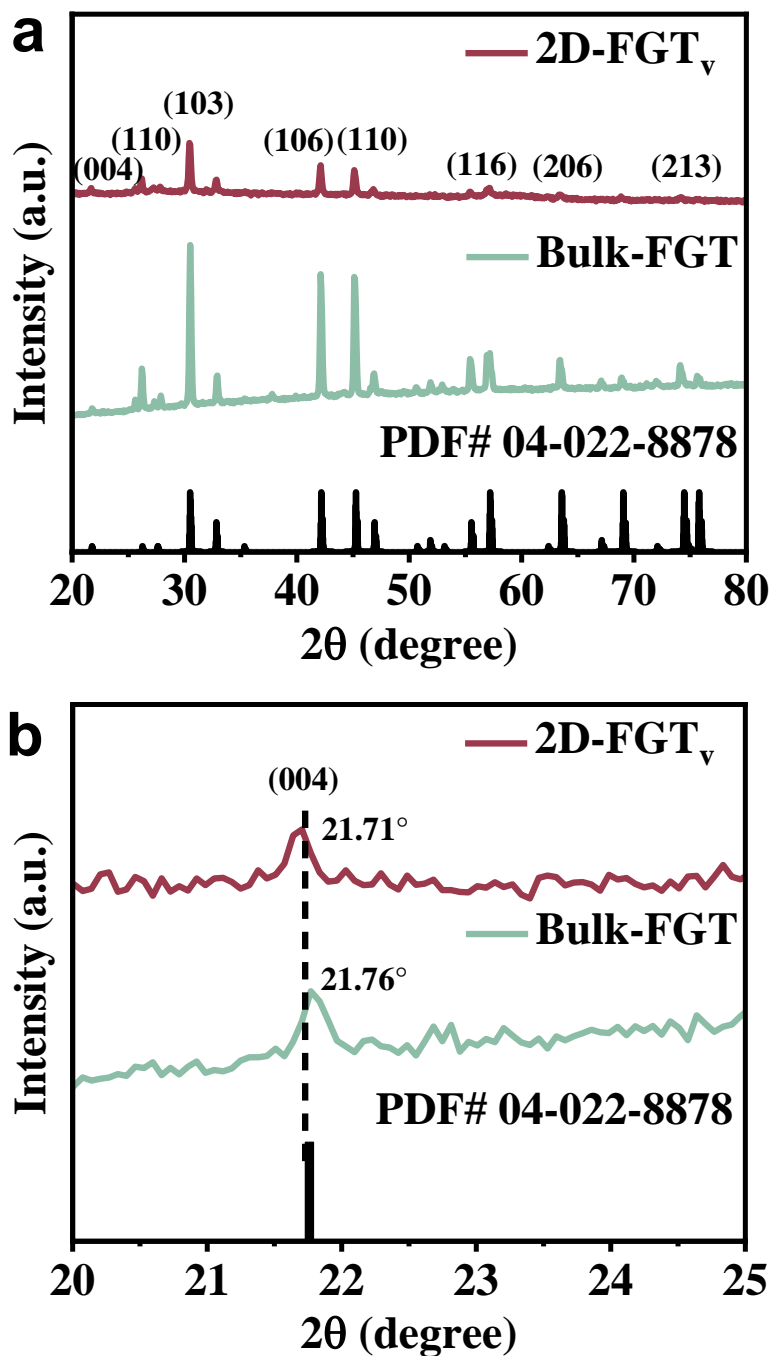

**Figure S25.** Bulk-FGT and 2D-FGT<sub>v</sub> (a) XRD patterns (20° - 80°). (b) The details about (004) plane of XRD pattern (20° - 25°), indicating the lattice expansion from Bulk-FGT to 2D-FGT<sub>v</sub>.

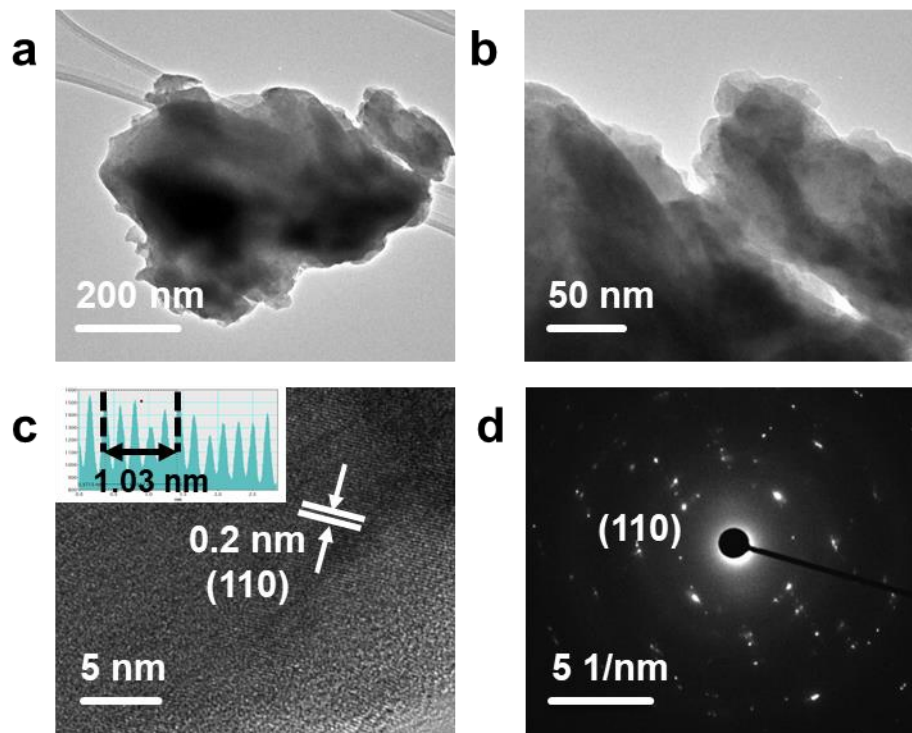

**Figure S26.** TEM of bulk-FGT. (a-b) Bulk-FGT TEM images. (c) HRTEM images for Bulk-FGT. (d) SAED pattern for Bulk-FGT.

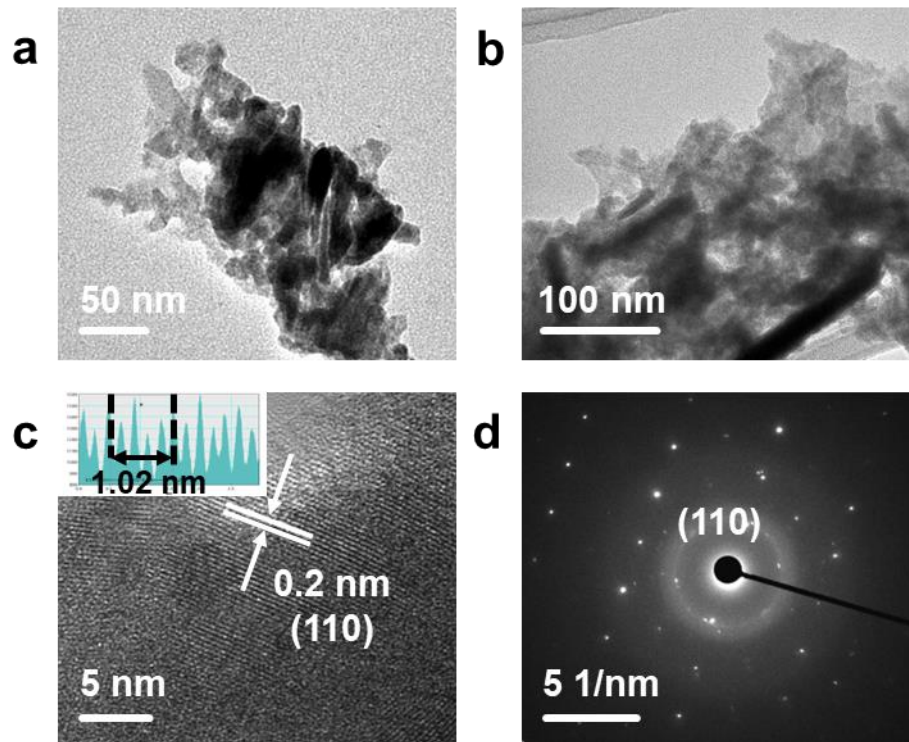

**Figure S27.** (a-b) TEM image of 2D-FGT<sub>v</sub>, (c) HRTEM image of 2D-FGT<sub>v</sub>, (d) SAED pattern of 2D-FGT<sub>v</sub>.

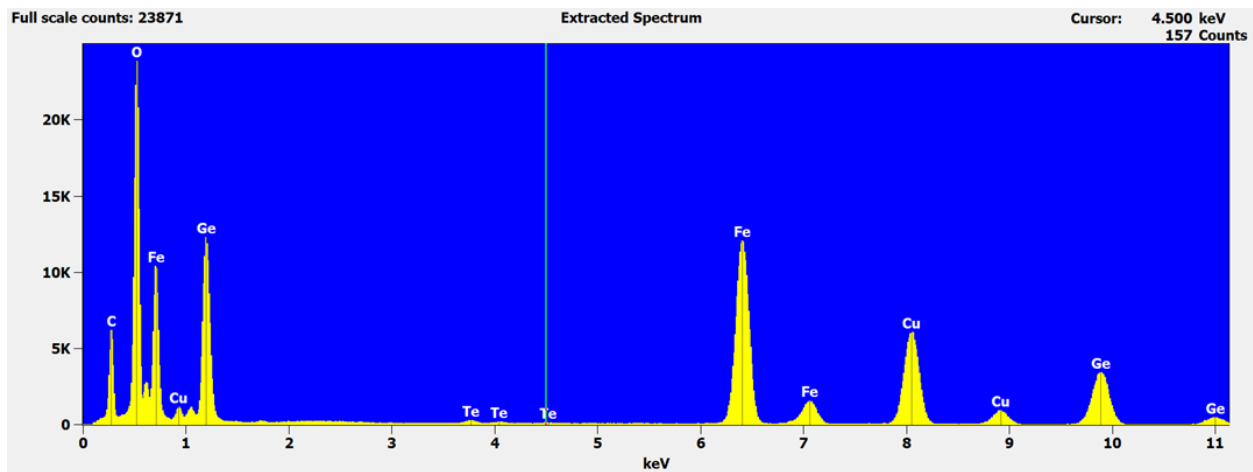

**Figure S28.** EDS spectrum of 2D-FGT<sub>v</sub> indicates the existing Fe, Ge, and Te of 2D-FGT<sub>v</sub>.

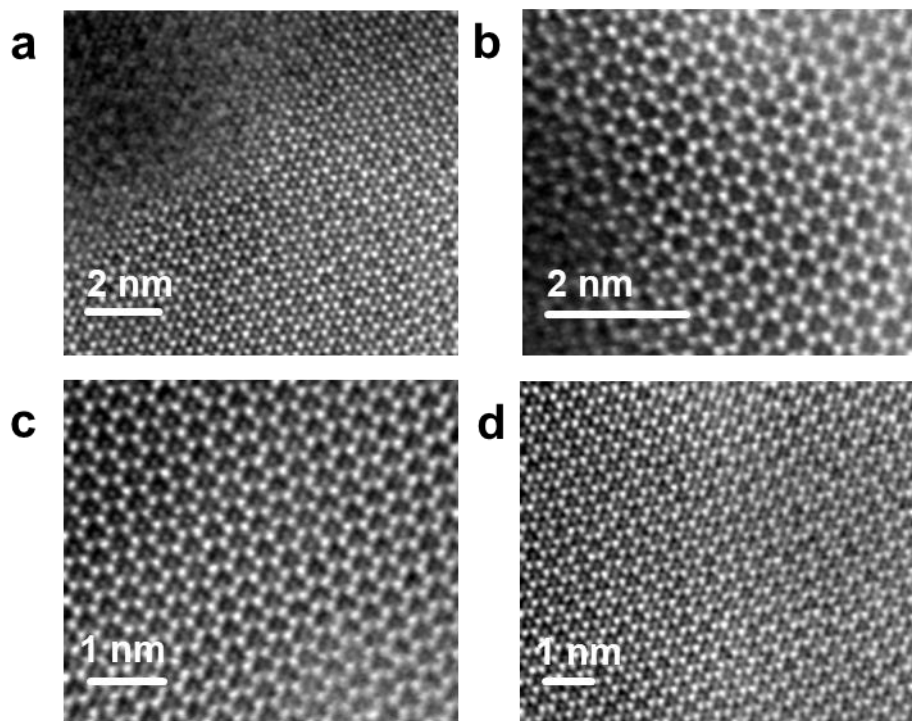

**Figure S29.** STEM images of 2D-FGT<sub>v</sub>.

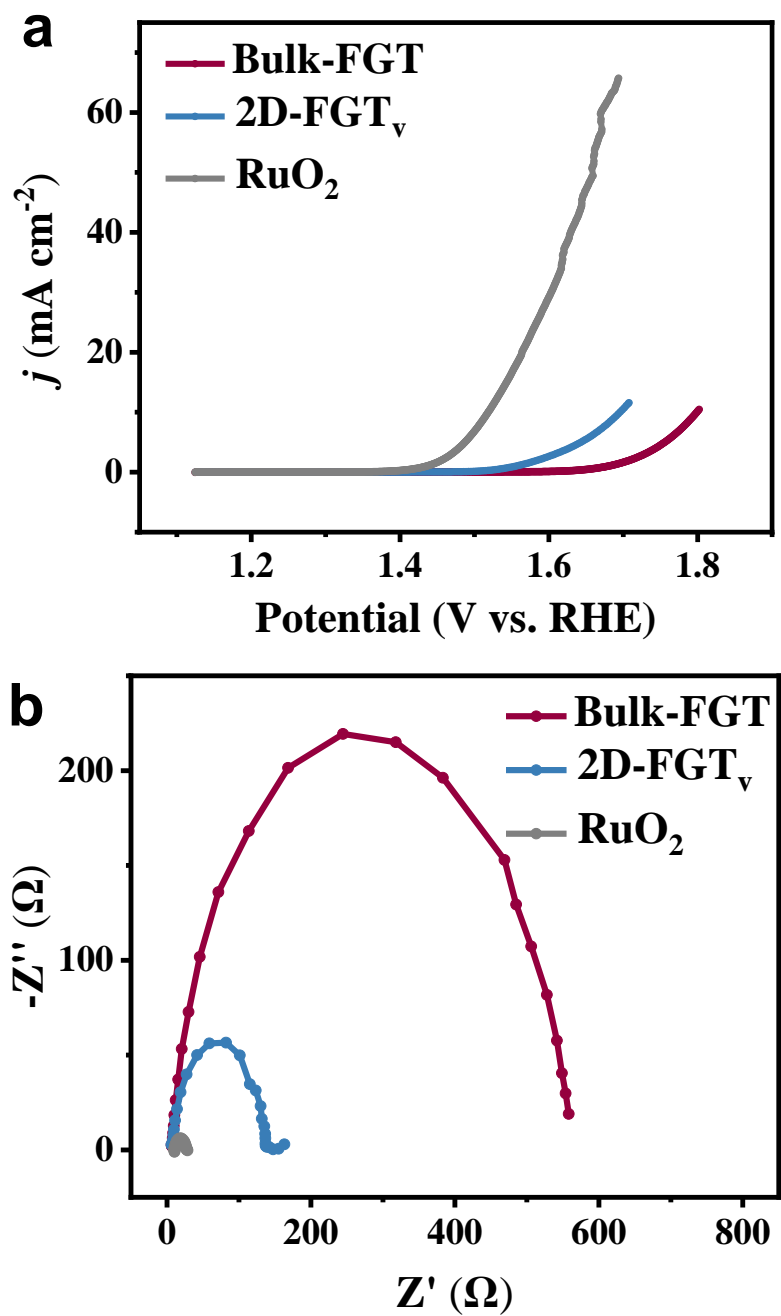

**Figure S30.** Alkaline OER for Bulk-FGT and 2D-FGT<sub>v</sub>. (a) LSV curves for FGT catalysts and RuO<sub>2</sub>. (b) EIS Nyquist plots of FGT and RuO<sub>2</sub> at 1.65 V vs RHE.



**Table S1.** Fitting results for Ni, Ge, Te XPS peaks for Bulk NGT and 2D-NGT<sub>v</sub>.

| XPS<br>Peak                             | Bulk-NGT     |              |                    |               | 2D-NGT <sub>v</sub> |              |                    |               |
|-----------------------------------------|--------------|--------------|--------------------|---------------|---------------------|--------------|--------------------|---------------|
|                                         | Peak<br>(BE) | FWHM<br>(eV) | Area (P)<br>CPS.eV | Atomic<br>(%) | Peak<br>(BE)        | FWHM<br>(eV) | Area (P)<br>CPS.eV | Atomic<br>(%) |
| <b>Ni2p<sub>1/2</sub></b>               | 870.08       | 2.29         | 55594.2            | 9.83          | 870.38              | 2.6          | 23304.59           | 3.82          |
| <b>Ni2p<sub>1/2</sub><br/>Oxidized</b>  | 873.58       | 2.98         | 37141.17           | 6.6           | 873.98              | 4.21         | 58537.76           | 9.64          |
| <b>Ni2p<sub>1/2</sub><br/>satellite</b> | 876.28       | 2.37         | 12157.76           | 2.17          | 879.48              | 4.38         | 17659.61           | 2.93          |
| <b>Ni2p<sub>3/2</sub></b>               | 852.88       | 1.31         | 68768.43           | 11.92         | 852.78              | 1.62         | 27184.53           | 4.37          |
| <b>Ni2p<sub>3/2</sub><br/>Oxidized</b>  | 855.68       | 3.81         | 53858.77           | 9.37          | 856.08              | 3.87         | 84770.51           | 13.68         |
| <b>Ni2p<sub>3/2</sub><br/>satellite</b> | 860.48       | 4.23         | 27805.27           | 4.86          | 861.78              | 4.61         | 41518.33           | 6.74          |
| <b>Ge3d</b>                             | 29.68        | 1.35         | 7515.59            | 0.7           | 29.48               | 1.17         | 1417.22            | 1.95          |
| <b>GeO</b>                              | 32.38        | 3.13         | 12311.77           | 1.14          | 32.48               | 2.52         | 18517.34           | 25.53         |
| <b>GeO<sub>2</sub></b>                  | 35.08        | 1.87         | 1905.38            | 0.18          | 34.88               | 1.65         | 1981.92            | 2.74          |
| <b>Te3d<sub>3/2</sub><br/>Oxidized</b>  | 572.88       | 2.02         | 235712.4           | 31.19         | 572.88              | 2.02         | 132233.8           | 7.96          |
| <b>Te3d<sub>3/2</sub></b>               | 576.18       | 1.81         | 56646.04           | 7.52          | 576.18              | 3            | 157894             | 9.53          |
| <b>Te3d<sub>5/2</sub><br/>Oxidized</b>  | 583.28       | 1.38         | 108142.4           | 14.44         | 583.18              | 1.9          | 79978.18           | 4.85          |
| <b>Te3d<sub>5/2</sub></b>               | 586.58       | 1.56         | 29591.58           | 0.09          | 586.58              | 3.02         | 102726             | 6.25          |

**Table S2.** EXAFS fitting results at Ni K-edge and Ge K-edge for Bulk-NGT and 2D-NGT<sub>v</sub>.

| <b>Ni K-edge</b>          |       |       |         |                        |                         |           |
|---------------------------|-------|-------|---------|------------------------|-------------------------|-----------|
| <b>Sample</b>             | shell | N     | R(Å)    | $\sigma^2(\text{Å}^2)$ | $\Delta E_0(\text{eV})$ | R factor  |
| <b>Bulk-NGT</b>           | Ni-Te | 4.83  | 2.58521 | 0.02049                | -1.705                  | 0.0294998 |
| <b>Bulk-NGT</b>           | Ni-O  | 5.988 | 2.20137 | 0.04446                | -1.705                  | 0.0294998 |
| <b>Bulk-NGT</b>           | Ni-Ni | 9.21  | 2.56593 | 0.02600                | -1.705                  | 0.0294998 |
| <b>2D-NGT<sub>v</sub></b> | Ni-O  | 2.463 | 2.08671 | 0.00716                | 9.571                   | 0.0111917 |
| <b>2D-NGT<sub>v</sub></b> | Ni-Ni | 3.488 | 3.09876 | 0.02544                | 9.571                   | 0.0111917 |
| <b>Ge K-edge</b>          |       |       |         |                        |                         |           |
| <b>Sample</b>             | shell | N     | R(Å)    | $\sigma^2(\text{Å}^2)$ | $\Delta E_0(\text{eV})$ | R factor  |
| <b>Bulk-NGT</b>           | Ge-Ni | 4.9   | 2.38803 | 0.01142                | 5.22                    | 0.0181649 |
| <b>Bulk-NGT</b>           | Ge-O  | 4.59  | 1.82658 | 0.05909                | 5.22                    | 0.0181649 |
| <b>2D-NGT<sub>v</sub></b> | Ge-O  | 1.696 | 1.76363 | 0.00010                | 3.356                   | 0.0064027 |
| <b>2D-NGT<sub>v</sub></b> | Ge-Ni | 1.812 | 2.41574 | 0.00737                | 3.356                   | 0.0064027 |

Ni K-edge: Bulk-NGT:  $S_0^2$  was set to 0.805 for Te, 0.921 for Ni, and 0.998 for O.

2D-NGT<sub>v</sub>:  $S_0^2$  was set to 0.821 for O and 0.872 for Ni.

Ge K-edge: Bulk-NGT:  $S_0^2$  was set to 0.980 for O and 0.918 for Ni.

2D-NGT<sub>v</sub>:  $S_0^2$  was set to 0.849 for O and 0.907 for Ni.

**Table S3. The fitted values for each equivalent circuit element**

| Electrocatalysts    | Element | Value      |
|---------------------|---------|------------|
| 2D-NGT <sub>v</sub> | R1      | 9.828      |
|                     | CPE1-T  | 1.9889E-05 |
|                     | CPE-P   | 0.91856    |
|                     | R2      | 3.58       |
|                     | CPE2-T  | 0.0035143  |
|                     | CPE2-P  | 0.76187    |
|                     | R3      | 3.168      |
| Bulk-NGT            | R1      | 10.05      |
|                     | CPE1-T  | 5.4895E-05 |
|                     | CPE-P   | 0.81884    |
|                     | R2      | 98.04      |
| RuO <sub>2</sub>    | R1      | 10.04      |
|                     | CPE1-T  | 0.0002643  |
|                     | CPE-P   | 0.85384    |
|                     | R2      | 14.96      |

**Table S4.** The Overpotential and Tafel Slope for OER electrocatalysts <sup>[1-11]</sup>.

| OER electrocatalysts                                      | Overpotential (mV) | Tafel Slope (mV dec <sup>-1</sup> ) |
|-----------------------------------------------------------|--------------------|-------------------------------------|
| 2D-NGT <sub>v</sub>                                       | 245                | 51.19                               |
| o-CoSe <sub>2</sub> -O                                    | 251                | 73                                  |
| NiFe LDH                                                  | 254                | 32                                  |
| Co-MoS <sub>2</sub> /BCCF                                 | 260                | 85                                  |
| Cu <sub>0.33</sub> Co <sub>0.67</sub> S <sub>2</sub> /CNT | 284                | 86                                  |
| Fe <sub>2</sub> P <sub>2</sub> S <sub>6</sub>             | 288                | 45.7                                |
| CoSe@NMC                                                  | 290                | 66.1                                |
| CoTe <sub>2</sub> @N-GC                                   | 300                | 90                                  |
| NiPS <sub>3</sub> NS                                      | 301                | 43                                  |
| FeCoS <sub>2</sub> /Co <sub>0.85</sub> Se                 | 330                | 50.8                                |
| CoTe <sub>2</sub> /NF                                     | 375                | 68                                  |
| FePS <sub>3</sub>                                         | 390                | 58                                  |

## Reference

- [1] Z. Ma, C. Xiao, Z. Cui, W. Du, Q. Li, R. Sa, C. Sun, *Journal of Materials Chemistry A* **2021**, 9, 6945.
- [2] Y. Zhao, J. Gu, Z. Chen, *Adv. Funct. Mater.* **2019**, 29.
- [3] X. Song, Y. Qu, L. Zhao, M. Zhao, *ACS Appl. Mater. Interfaces* **2021**, 13, 11845.
- [4] Z. Wu, Y. Zhao, W. Jin, B. Jia, J. Wang, T. Ma, *Adv. Funct. Mater.* **2020**, 31.
- [5] Y. Li, X. Du, J. Huang, C. Wu, Y. Sun, G. Zou, C. Yang, J. Xiong, *Small* **2019**, 15, 1901980.
- [6] M. Zhao, H. J. Peng, B. Q. Li, X. Chen, J. Xie, X. Liu, Q. Zhang, J. Q. Huang, *Angew. Chem., Int. Ed.* **2020**, 59, 9011.
- [7] H.J. Deiseroth, K. Aleksandrov, C. Reiner, L. Kienle, R.K. Kremer, *Eur. J. Inorg. Chem.* **2006**, 8, 1561.
- [8] R. Gao, L. Pan, H. Wang, Y. Yao, X. Zhang, L. Wang, J.J. Zou, *Adv. Sci.* **2019**, 6, 1900054.
- [9] Z. Ma, H. Meng, M. Wang, B. Tang, J. Li, X. Wang, *ChemElectroChem*, **2018**, 5, 335.
- [10] J. G. Li, K. Xie, H. Sun, Z. Li, X. Ao, Z. Chen, K. K. Ostrikov, C. Wang, W. Zhang, *ACS Appl. Mater. Interfaces* **2019**, 11, 36649.
- [11] Y. Zhao, X. Zhang, X. Jia, G.I. Waterhouse, R. Shi, X. Zhang, F. Zhan, Y. Tao, L.Z. Wu, C.H. Tung, D. O'Hare, *Adv. Energy Mater.* **2018**, 8, 1703585.
